# Supplementary material for: Optimizing human Treg immunotherapy by Treg subset selection and E-selectin ligand expression
Source: PubMed Central journal article supplement (PMC5765004; doi:10.1038/s41598-017-17981-z), 2018-01-11
Supplement: 41598_2017_17981_MOESM1_ESM.pdf [file 41598_2017_17981_MOESM1_ESM.pdf]

## **Optimizing human Treg immunotherapy by Treg subset selection and E-selectin ligand expression**

Conor Donnelly<sup>2,4,5</sup>, Brad Dykstra<sup>2,4,6</sup>, Nandini Mondal<sup>2,4</sup>, Junning Huang<sup>1</sup>, Belinda J. Kaskow<sup>1</sup>, Russell Griffin<sup>2</sup>, Robert Sackstein<sup>2,3,4</sup>, and Clare Baecher-Allan<sup>1,2</sup>

<sup>1</sup>Ann Romney Center for Neurologic Disease, Harvard Medical School, Boston, MA 02115;

<sup>2</sup>Department of Dermatology, and <sup>3</sup>Department of Medicine, Brigham and Women's Hospital, Boston, Harvard Medical School, MA 02115; <sup>4</sup>Program of Excellence in Glycosciences, Harvard Medical School, Boston, MA 02115, <sup>5</sup>University of Pittsburgh School of Medicine, Pittsburgh PA; <sup>6</sup>Platelet Biogenesis, Boston, MA;

### **SUPPLEMENTAL DATA**

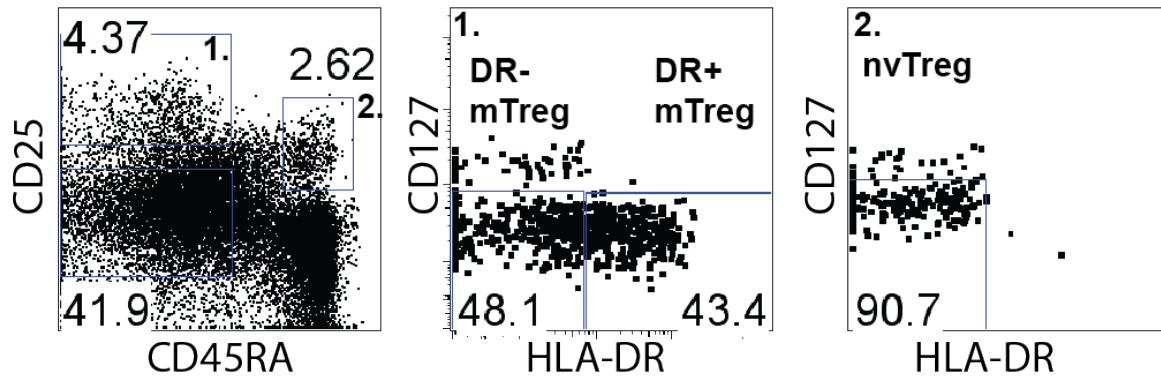

**Supplemental Figure 1:** Treg and Tresp sorting strategy. Total CD4 T cells were first isolated from PBMCs via negative selection by Miltenyi Biotec CD4 negative isolation kit II, then FACS sorted. Naïve Tregs were  $CD25^{hi} CD45RA^{+} CD127^{lo} HLA-DR^{-}$ ; DR- mTregs were  $CD25^{hi} CD45RA^{-} CD127^{lo} HLA-DR^{-}$ ; DR+ mTregs were  $CD25^{hi} CD45RA^{-} CD127^{lo} HLA-DR^{+}$ ; mTresp were  $CD25^{lo} CD45RA^{-} CD127^{hi}$ .

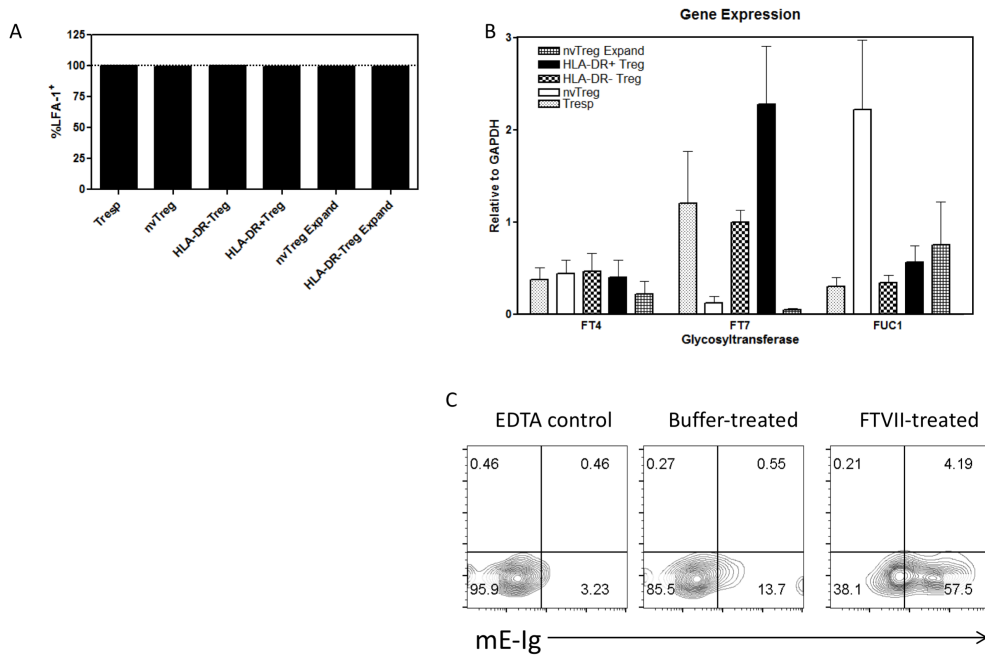

**Supplemental Figure 2:** (A) LFA-1 staining of “freshly isolated” and expanded Treg subsets. (B) The ex vivo freshly isolated T cells subsets and 14-day in vitro expanded nvTregs were tested for their levels of expression of FT-IV, FT-VII, and FUC1. (C) Expanded nvTreg, buffer-treated or FTVII-treated, were stained with mouse E-selectin-Ig with EDTA control on the far left (binding is calcium dependent) to demonstrate the induced expression of cell surface sLe<sup>x</sup> was functional.

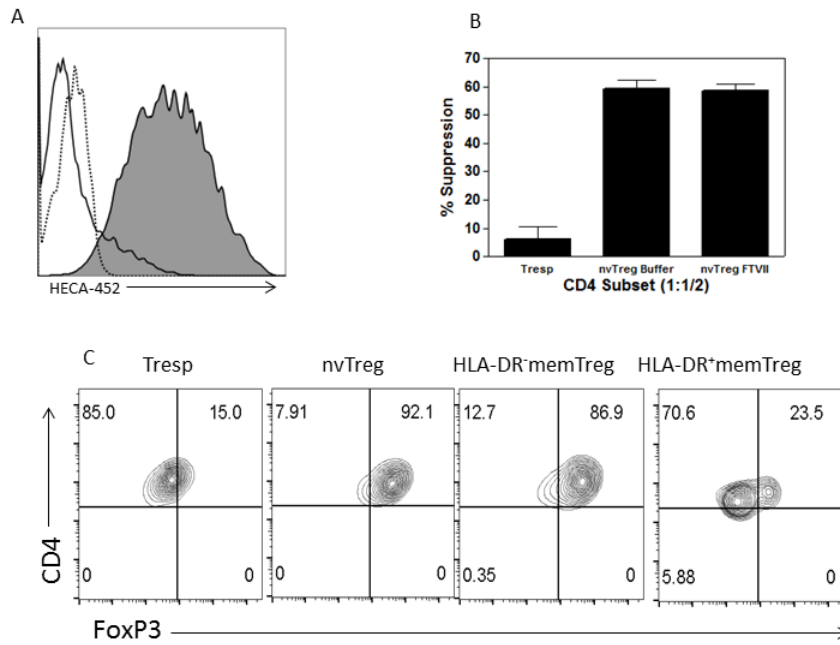

**Supplemental Figure 3:** (A) FTVII-treated cells (gray histogram) were treated with pronase (white histogram) and stained with HECA-452 mAb demonstrating that FTVII treatment primarily induced sLex moieties on cell surface proteins. (B) Buffer- or FTVII-treated expanded nvTregs showed equivalent ability to suppress Tresp proliferation. (C) Plots showing the typical FoxP3 staining on the various CD4<sup>+</sup> subsets after two weeks of in vitro expansion.

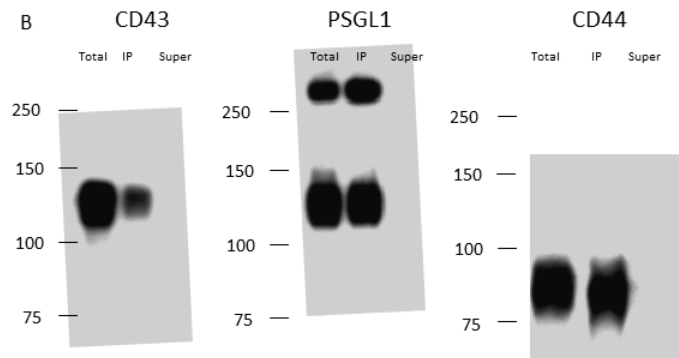

**Supplemental Figure 4.** Each step in the sequential immunoprecipitation studies was tested and shown to have been a complete immunodepletion of the indicated proteins as each could no longer be detected in the supernatant that was then immunoprecipitated with the subsequent mAbs until no e-selectin ligand binding proteins remained in the lysates as shown in Figure 4G in the accompanying manuscript. The mAbs used in precipitating and detecting the different sLe<sup>x</sup> scaffold proteins were: CD43 (1G10, L60, BD Biosciences; 20819, Santa Cruz Biotechnology), PSGL-1 (KPL-1, BD Biosciences; 20929, Santa Cruz Biotechnology), and CD44 (515, BD Biosciences; 2C5, RnD systems). (Note these sections of western blots were cropped from the whole blot films shown below, the lanes were not altered in any manner)

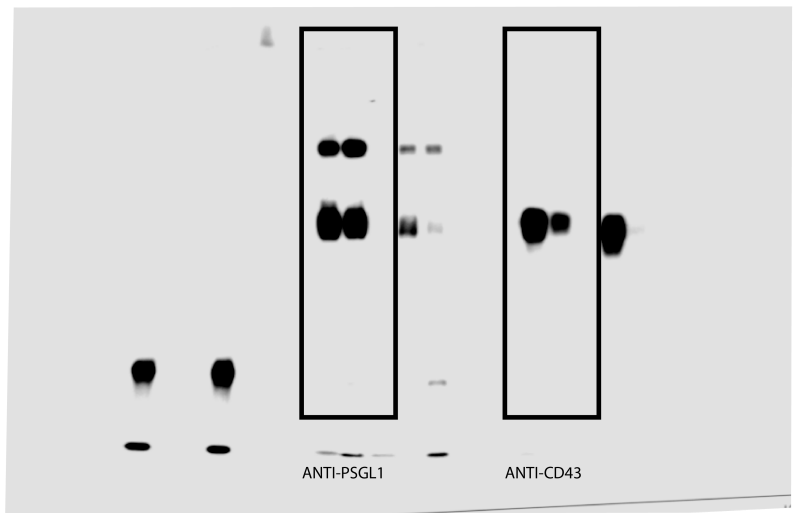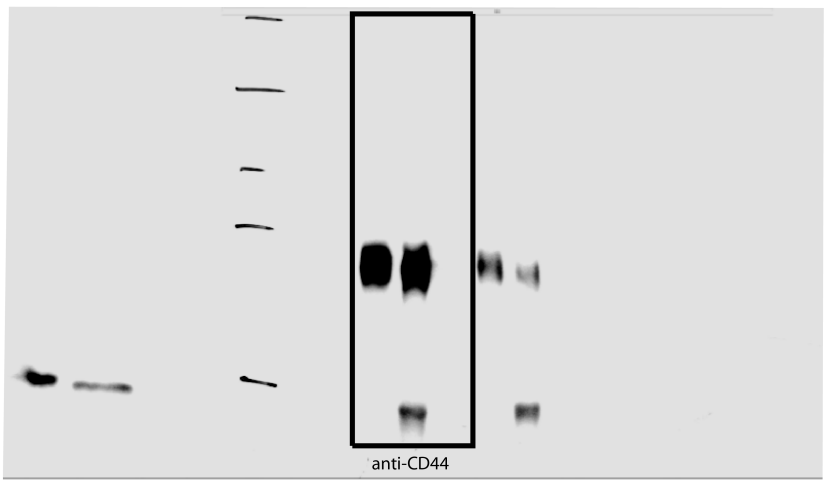

Supplemental Table 1

| Protein     | Forward Primer (5' -3') | Reverse Primer (5' -3' ) |
|-------------|-------------------------|--------------------------|
| FIIV        | GGGTTTGGATGAACTTCGAGTCG | GGTAGCCATAAGGCACAAAGACG  |
| FVII        | TCCGCGTGCGACTGTTC       | GTGTGGGTAGCGGCACAGA      |
| Fucosidase1 | AGTCACCCTGTTGCCTATGG    | TTTGGCGCTTTTAGATTGCT     |

**Supplemental Table 1:** Oligos used for detection of fucosyltransferase 4 (FUT4), fucosyltransferase 7 (FUT7) and fucosidase 1 $\alpha$ , (FUC1).
